# Supplementary material for: Effects of different correction algorithms on absorption coefficient – a comparison of three optical absorption photometers at a boreal forest site
Source: Copernicus journal article supplement (doi:10.5194/amt-14-6419-2021), 2021-10-06
Supplement: Supplementary file 1 [file amt-14-6419-2021-supplement.pdf]

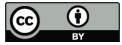

*Supplement of*

**Effects of different correction algorithms on absorption coefficient  
– a comparison of three optical absorption photometers at  
a boreal forest site**

**Krista Luoma et al.**

*Correspondence to:* Krista Luoma ([krista.q.luoma@helsinki.fi](mailto:krista.q.luoma@helsinki.fi))

The copyright of individual parts of the supplement might differ from the article licence.

## S1 Data availability

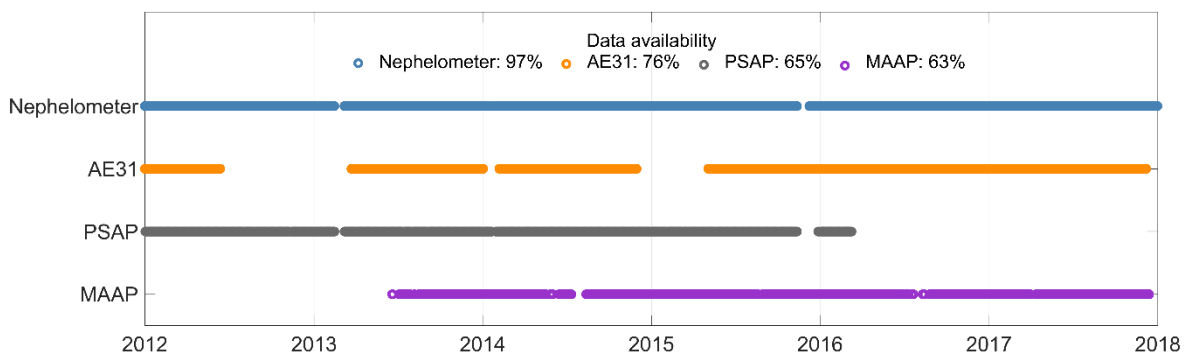

5

**Figure S1:** The availability of the optical aerosol data at SMEAR II station from the integrating nephelometer, AE31, PSAP, and MAAp. The dots represent days that had at least 50% of data available. The data availability for each instrument for the whole period of 2012 - 2017 is given in the legend.

## S2 The variation in $C_{ref}$

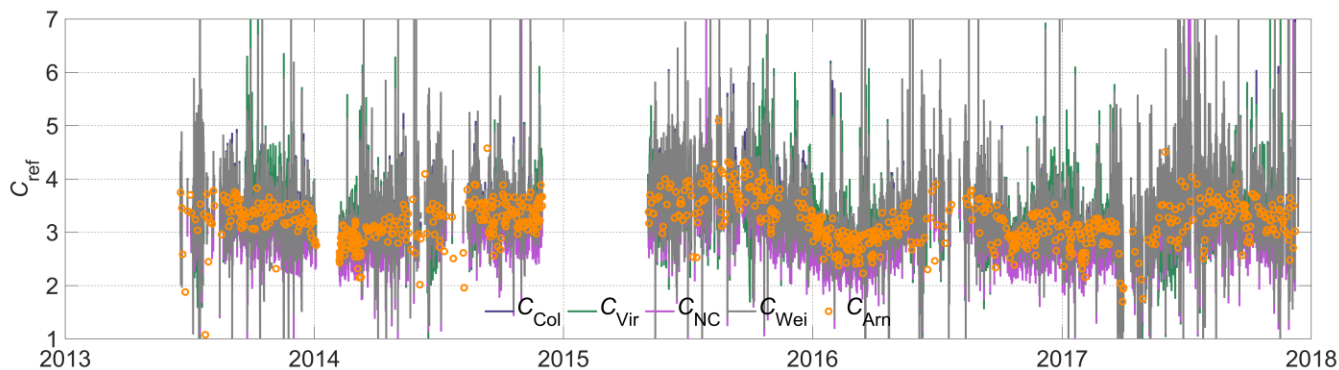

10

**Figure S2.**  $C_{ref}$  for different correction algorithms.

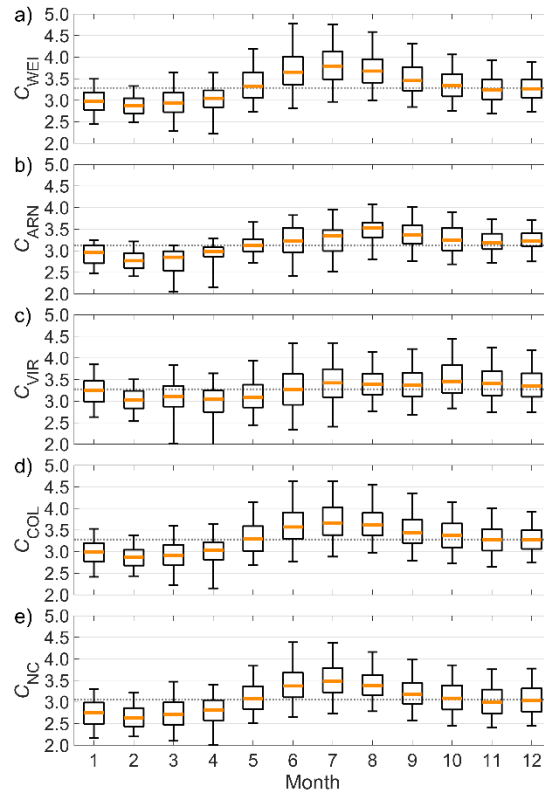

**Figure S3: The monthly statistics of the  $C_{ref}$  for different correction algorithms. The orange line in the middle represents the monthly median, the edges of the boxes are the 25<sup>th</sup> and 75<sup>th</sup> percentiles and the whiskers are the 5<sup>th</sup> and 95<sup>th</sup> percentiles.**

## S2 Effect of loading on $\sigma_{\text{abs}}$

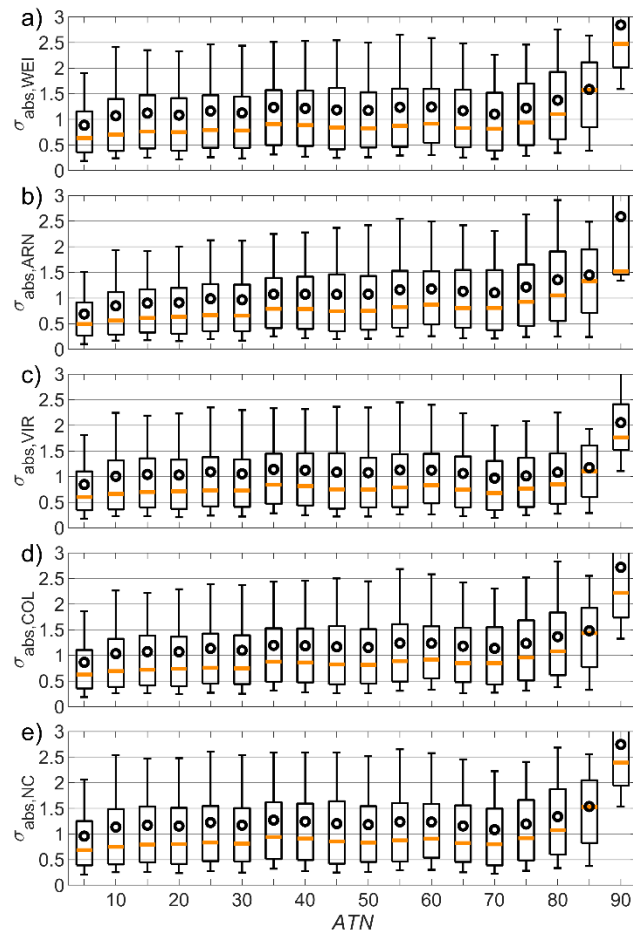

Figure S4: Dependency of  $\sigma_{\text{abs}}$  on the *ATN* for different AE31 correction algorithms.

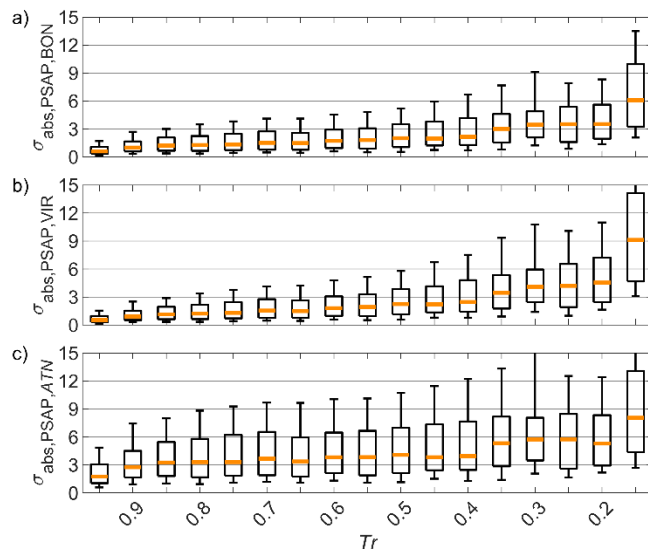

Figures S5: The dependency of  $\sigma_{\text{abs}}$  on the  $Tr$  for different PSAP correction algorithms.

#### S4 The time series of the compensation parameter

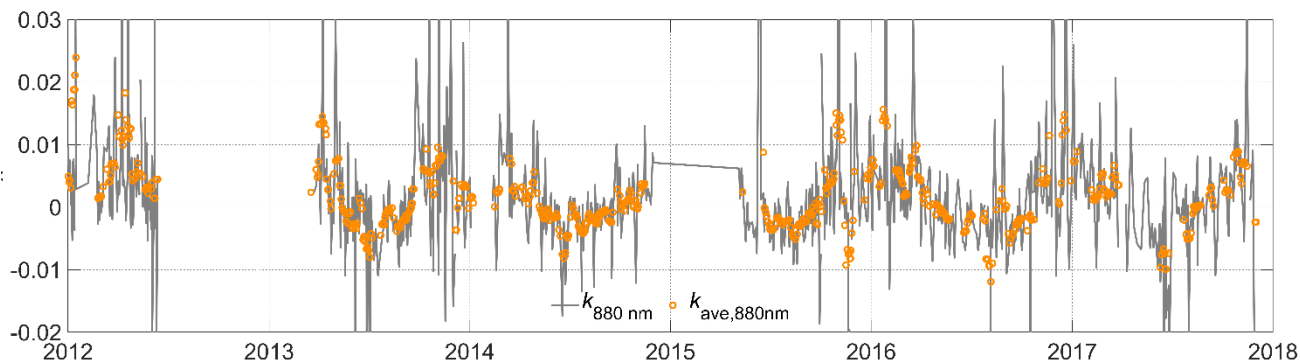

5

Figure S6: Time series of the compensation parameter ( $k$ ) at 880 nm. The figure is presented for both “raw”  $k$  values and the averaged ones.
